# Supplementary material
Source: HighWire-hosted journal article supplement (https://ez-admanager.com/highwire/filestream/161053/field_highwire_adjunct_files/0/Taqui_1305.pdf)
Supplement: Taqui_1305.pdf [file Taqui_1305.pdf]

## 病院前遠隔診療による患者評価と 血栓溶解治療までの時間の短縮

Reduction in time to treatment in prehospital telemedicine  
evaluation and thrombolysis

Ather Taqui, MD\*;  
Russell Cerejo, MD\*;  
Ahmed Itrat, MD\*;  
Farren B.S. Briggs, PhD;  
Andrew P. Reimer, PhD, RN;  
Stacey Winners, RT, MSc\*;  
Natalie Organek, DO;  
Andrew B. Buletko, MD;  
Lila Sheikhi, MD;  
Sung-Min Cho, DO;  
Maureen Buttrick, RN\*;  
Megan M. Donohue, MD\*;  
Zeshaun Khawaja, MD\*;  
Dolora Wisco, MD\*;  
Jennifer A. Frontera, MD\*;  
Andrew N. Russman, DO\*;  
Fredric M. Hustey, MD;  
Damon M. Kralovic, DO;  
Peter Rasmussen, MD\*;  
Ken Uchino, MD\*;  
Muhammad S. Hussain,  
MD\*;  
On behalf of the Cleveland  
Pre-Hospital Acute Stroke  
Treatment (PHAST) Group

\*Cerebrovascular Center,  
Cleveland Clinic, OH

Correspondence to Dr. Hussain:  
hussais4@ccf.org

**目的：**遠隔診療を実現するモバイル脳卒中治療ユニット (mobile stroke treatment unit; MSTU) と従来の救急車による救急科 (ED) への搬送について、患者の評価までの時間と血栓溶解治療までの時間を比較する。

**方法：**著者らの施設では2014年7月18日からMSTUによる遠隔医療を実施している。脳血管神経内科医が遠隔で患者を診療し、神経放射線科医および脳血管神経内科医がMSTUのCTで得た画像を遠隔で評価した。データは前向きに登録された。MSTUを利用した最初の患者100例 (MSTU群, 期間: 2014年7月18日~11月1日) と、2014年に従来の救急車でEDに搬送された患者53例 (対照群) の評価と治療を比較した。時間は中央値と四分位範囲で示した。

**結果：**患者の特徴および脳卒中の重症度はMSTU群100例と対照群53例と同様であった (当初のNIH脳卒中スケールのスコアは6 vs. 7,  $p=0.679$ )。救急通報からCTスキャン終了までの時間の中央値 (MSTU群: 33分, 対照群: 56分,  $p<0.0001$ )、救急通報から血栓溶解までの時間の中央値 (MSTU群: 55.5分, 対照群: 94分,  $p<0.0001$ )、MSTUまたは救急車への到着から血栓溶解までの時間の中央値 (MSTU群: 31.5分, 対照群: 58分,  $p=0.0012$ )、症状発現から血栓溶解までの時間の中央値 (MSTU群: 97分, 対照群: 122.5分,  $p=0.0485$ ) について有意な短縮が認められた。MSTU群のうち16例が血栓溶解治療を受け、うち25%は症状発現から60分以内に受けていた。

**結論：**従来の救急車を使用したモデルに比べ、遠隔診療を可能とする救急車を使用した血栓溶解では、画像診断と治療までの時間が有意に短縮された。

Neurology® 2017; 88: 1305-1312

図1 モバイル脳卒中治療ユニット (MSTU) の設備

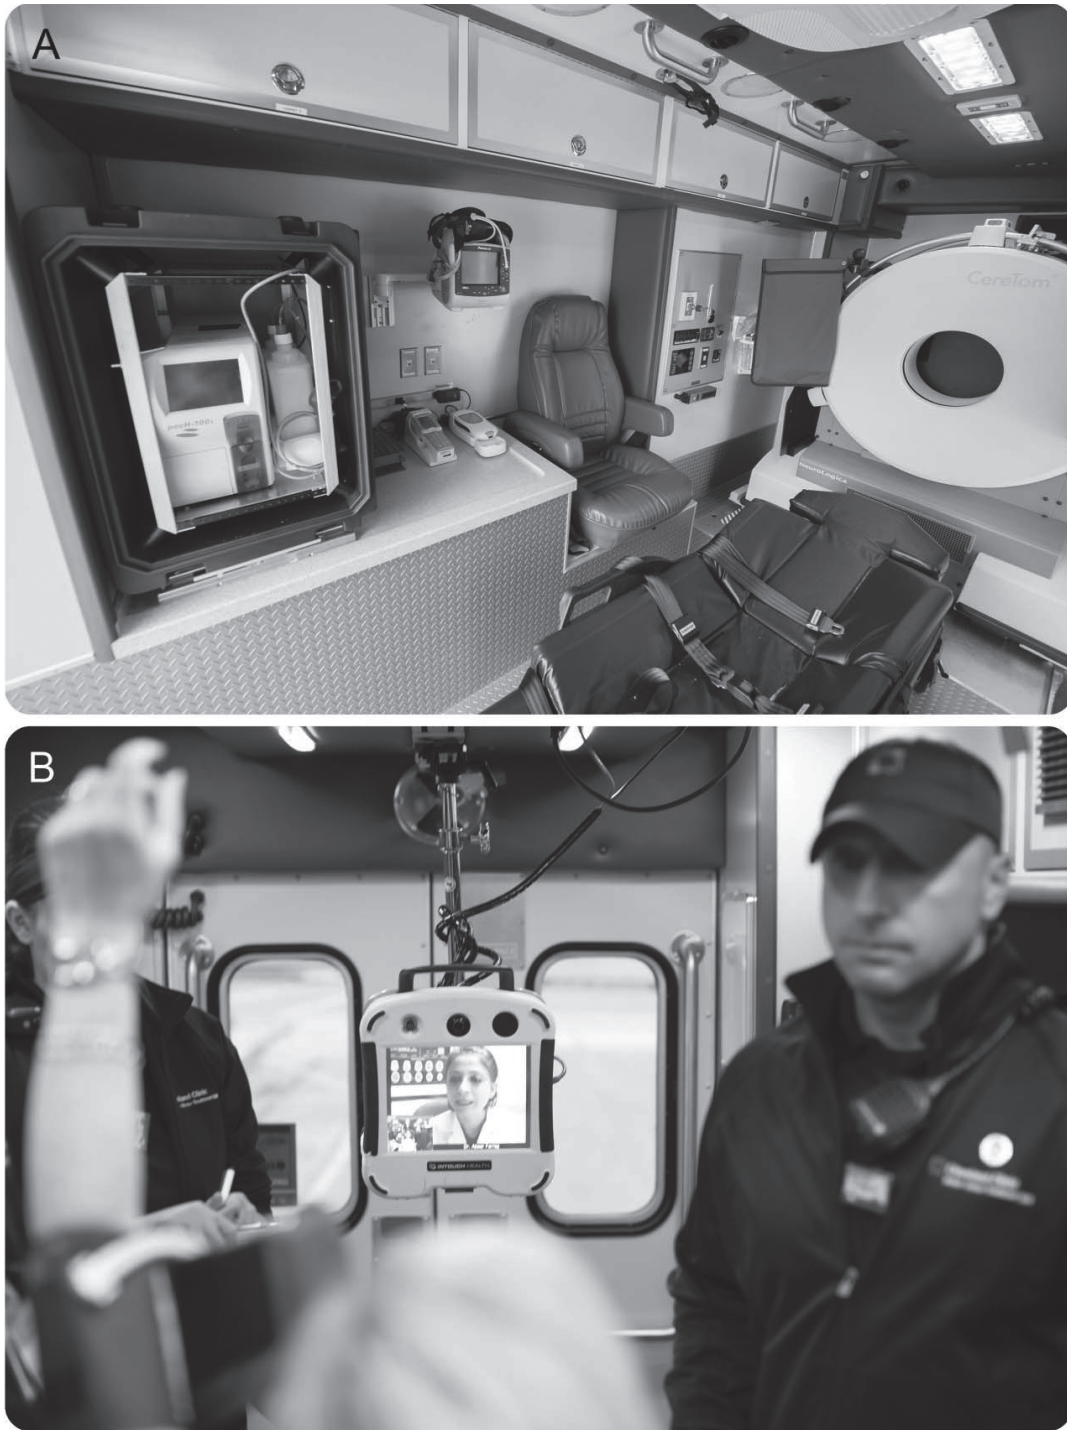

(A) CTスキャナーと検査機器。(B) MSTUでの遠隔診療。
